# Supplementary material
Source: HighWire-hosted journal article supplement (http://ebm.bmjjournals.com/highwire/filestream/142130/field_highwire_adjunct_files/0/ebmed-2014-110146supp_appendix1.pdf)
Supplement: ebmed-2014-110146supp_appendix1.pdf [file ebmed-2014-110146supp_appendix1.pdf]

Appendix 1. GRADE Criteria Used for Grading the Strength of Recommendation (extracted from: Paul E. Stevens, MBBS, BSc, and Adeera Levin, MD, BSc, for the Kidney Disease: Improving Global Outcomes Chronic Kidney Disease Guideline Development Work Group Members\*. Evaluation and Management of Chronic Kidney Disease: Synopsis of the Kidney Disease: Improving Global Outcomes 2012 Clinical Practice Guideline. Ann Intern Med. 2013;158:825-830)

| Strength of recommendation | Patients                                                                                                           | Clinicians                                                                                                                                                                 | Policymakers                                                                                                               |
|----------------------------|--------------------------------------------------------------------------------------------------------------------|----------------------------------------------------------------------------------------------------------------------------------------------------------------------------|----------------------------------------------------------------------------------------------------------------------------|
| Strong                     | Most persons in this situation would—and only a small proportion would not— want the recommended course of action. | Most patients should receive the recommended course of action.                                                                                                             | The recommendation can be evaluated as a candidate for developing a policy or a performance measure.                       |
| Weak                       | Most persons in this situation would—but many would not— want the recommended course of action.                    | Different choices will be appropriate for different patients. Each patient needs help to arrive at a management decision consistent with his or her values and preferences | The recommendation is likely to require substantial debate and involvement of stakeholders before policy can be determined |
